# Supplementary material
Source: Royal Society of Chemistry journal article supplement (doi:10.1039/d6ce00323k)
Supplement: d6ce00323k1.pdf [file d6ce00323k1.pdf]

## Supporting Information

### NaCl-Assisted Growth of Ferroelectric SnSe Nanosheets with Spin Glass-like Behavior

Huiwen Xu, Hanxiang Wu, Chang Li, and Fei Pang\*

*School of Physics and Key Laboratory of Quantum State Construction and Manipulation (Ministry of Education), Renmin University of China, Beijing 100872, China*

\*Email: feipang@ruc.edu.cn

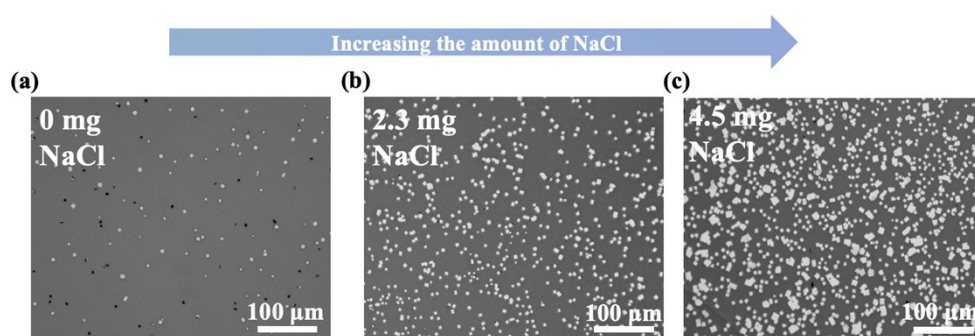

**Figure S1** Low-magnification OM images of SnSe nanosheets grown on mica with different amounts of NaCl.

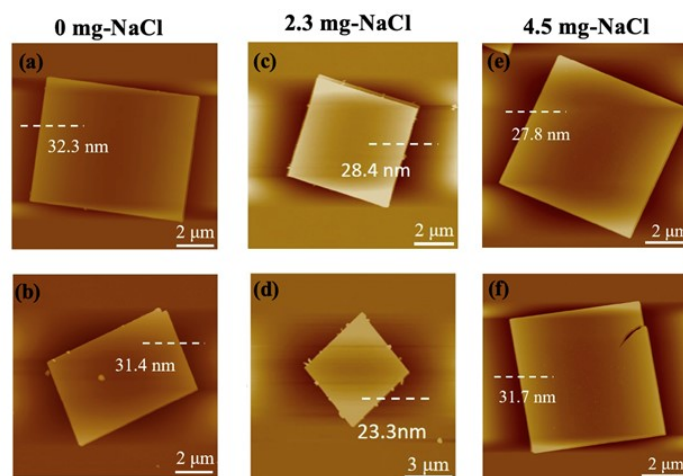

**Figure S2** AFM images of SnSe nanosheets grown on mica with different amounts of NaCl.
